# Supplementary material for: The Collagen Receptor uPARAP in Malignant Mesothelioma: A Potential Diagnostic Marker and Therapeutic Target
Source: MDPI journal article supplement (doi:10.3390/ijms222111452), 2021-10-23
Supplement: s1 [file s1]

**Table S1.** Abbreviations for TCGA cancer type.

| TCGA | Detail                                                           | TCGA | Detail                               |
|------|------------------------------------------------------------------|------|--------------------------------------|
| ACC  | Adrenocortical carcinoma                                         | LUSC | Lung squamous cell carcinoma         |
| BLCA | Bladder Urothelial Carcinoma                                     | MESO | Mesothelioma                         |
| BRCA | Breast invasive carcinoma                                        | OV   | Ovarian serous cystadenocarcinoma    |
| CESC | Cervical squamous cell carcinoma and endocervical adenocarcinoma | PAAD | Pancreatic adenocarcinoma            |
| CHOL | Cholangio carcinoma                                              | PCPG | Pheochromocytoma and Paraganglioma   |
| COAD | Colon adenocarcinoma                                             | PRAD | Prostate adenocarcinoma              |
| DLBC | Lymphoid Neoplasm Diffuse Large B-cell Lymphoma                  | READ | Rectum adenocarcinoma                |
| ESCA | Esophageal carcinoma                                             | SARC | Sarcoma                              |
| GBM  | Glioblastoma multiforme                                          | SKCM | Skin Cutaneous Melanoma              |
| HNSC | Head and Neck squamous cell carcinoma                            | STAD | Stomach adenocarcinoma               |
| KICH | Kidney Chromophobe                                               | TGCT | Testicular Germ Cell Tumors          |
| KIRC | Kidney renal clear cell carcinoma                                | THCA | Thyroid carcinoma                    |
| KIRP | Kidney renal papillary cell carcinoma                            | THYM | Thymoma                              |
| LAML | Acute Myeloid Leukemia                                           | UCEC | Uterine Corpus Endometrial Carcinoma |
| LGG  | Brain Lower Grade Glioma                                         | UCS  | Uterine Carcinosarcoma               |
| LIHC | Liver hepatocellular carcinoma                                   | UVM  | Uveal Melanoma                       |
| LUAD | Lung adenocarcinoma                                              |      |                                      |

**Table S2.** Demographic description of the patients with MM or RMP.

| Patient | Age-Sex | Diagnosis on the pleural specimen<br>(cause of resection if RMP) | Surgery type        | Asbestos<br>Exposure | BAP1 IHC | TNM    |
|---------|---------|------------------------------------------------------------------|---------------------|----------------------|----------|--------|
| 1       | 44M     | RMP (spontaneous pneumothorax)                                   | resection from lung | -                    | -        | -      |
| 2a      | 34F     | RMP (spontaneous pneumothorax)                                   | resection from lung | -                    | -        | -      |
| 2b      | 34F     | RMP (fibrotic pleuritis)                                         | pleural resection   | -                    | -        | -      |
| 3       | 55M     | RMP (lung fibrosis, UIP)                                         | lung cryobiopsy     | -                    | -        | -      |
| 4       | 68F     | RMP (chronic allergic alveolitis)                                | lung cryobiopsy     | -                    | -        | -      |
| 5       | 36M     | RMP (spontaneous pneumothorax)                                   | resection from lung | -                    | -        | -      |
| 6       | 27M     | RMP (spontaneous pneumothorax)                                   | resection from lung | -                    | -        | -      |
| 7       | 58M     | RMP (aorta aneurism)                                             | aorta resection     | -                    | -        | -      |
| 8       | 54M     | RMP (lung transplantation)                                       | lung explant        | -                    | -        | -      |
| 9       | 71 M    | RMP (lung fibrosis, UIP)                                         | surgical biopsy     | -                    | -        | -      |
| 10      | 29M     | RMP (spontaneous pneumothorax)                                   | resection from lung | -                    | -        | -      |
| 11      | 77M     | RMP (lung cancer)                                                | pulmonary lobectomy | -                    | -        | -      |
| 12      | 70M     | RMP (lung cancer)                                                | pulmonary lobectomy | -                    | -        | -      |
| 13a     | 65M     | Epithelioid MM                                                   | thoroscopic biopsy  | Yes                  | Positive | -      |
| 13b     | 65M     | Epithelioid MM                                                   | P/D                 | Yes                  | Positive | T3N0M0 |
| 14a     | 58M     | Epithelioid MM                                                   | thoroscopic biopsy  | No                   | Negative | -      |
| 14b     | 59M     | Epithelioid MM                                                   | P/D                 | No                   | Negative | T3N0M0 |
| 15a     | 65M     | Epithelioid MM                                                   | thoroscopic biopsy  | Yes                  | Positive | -      |
| 15b     | 65M     | Epithelioid MM                                                   | P/D                 | Yes                  | Positive | T3N2M0 |
| 16a     | 71M     | Epithelioid MM                                                   | thoroscopic biopsy  | Yes                  | Positive | -      |
| 16b     | 71M     | Epithelioid MM                                                   | P/D                 | Yes                  | Positive | T3N1M0 |
| 17a     | 73F     | Epithelioid MM                                                   | thoroscopic biopsy  | No                   | Negative | -      |
| 17b     | 73F     | Epithelioid MM                                                   | P/D                 | No                   | Negative | T3N0M0 |
| 18      | 60M     | Epithelioid MM                                                   | P/D                 | Yes                  | Negative | T2N0M0 |
| 19      | 65M     | Epithelioid MM                                                   | P/D                 | Yes                  | Positive | T3N0M0 |
| 20a     | 71M     | Biphasic MM                                                      | thoroscopic biopsy  | No                   | Positive | -      |

|     |     |                |                      |     |          |        |
|-----|-----|----------------|----------------------|-----|----------|--------|
| 20b | 71M | Biphasic MM    | P/D                  | No  | Positive | T3N0M0 |
| 21a | 64M | Biphasic MM    | thoracoscopic biopsy | Yes | Positive | -      |
| 21b | 64M | Biphasic MM    | P/D                  | Yes | Positive | T3N2M0 |
| 22a | 67F | Biphasic MM    | thoracoscopic biopsy | Yes | Negative | -      |
| 22b | 67F | Biphasic MM    | P/D                  | Yes | Negative | T3N0M0 |
| 23a | 57M | Biphasic MM    | thoracoscopic biopsy | No  | Positive | -      |
| 23b | 57M | Biphasic MM    | P/D                  | No  | Positive | T3N0M0 |
| 24a | 67M | Biphasic MM    | thoracoscopic biopsy | No  | Negative | -      |
| 24b | 67M | Biphasic MM    | P/D                  | No  | Negative | T3N2M0 |
| 25a | 63M | Biphasic MM    | thoracoscopic biopsy | Yes | Negative | -      |
| 25b | 63M | Biphasic MM    | P/D                  | Yes | Negative | T3NM0  |
| 26  | 72M | Biphasic MM    | thoracoscopic biopsy | NA  | Positive | -      |
| 27  | 70M | Biphasic MM    | P/D                  | Yes | NA       | T3N0M0 |
| 28  | 77M | Biphasic MM    | P/D                  | Yes | Positive | T3N0M0 |
| 29  | 61M | Biphasic MM    | P/D                  | Yes | Negative | T3N0M0 |
| 30  | 77M | Biphasic MM    | P/D                  | Yes | Positive | T2N0M0 |
| 31  | 71M | Sarcomatoid MM | thoracoscopic biopsy | No  | Negative | -      |
| 32  | 69M | Sarcomatoid MM | peritoneal resection | NA  | Positive | -      |
| 33  | 77M | Sarcomatoid MM | thoracoscopic biopsy | Yes | Positive | -      |
| 34  | 72F | Sarcomatoid MM | thoracoscopic biopsy | NA  | Positive | -      |
| 35  | 68M | Sarcomatoid MM | thoracoscopic biopsy | Yes | Positive | -      |
| 36a | 70F | Sarcomatoid MM | thoracoscopic biopsy | No  | Positive | -      |
| 36b | 70F | Sarcomatoid MM | P/D                  | No  | Positive | -      |
| 37  | 40M | Sarcomatoid MM | thoracoscopic biopsy | Yes | Positive | -      |
| 38  | 77M | Sarcomatoid MM | P/D                  | Yes | Positive | T3N0M0 |
| 39  | 73M | Sarcomatoid MM | thoracoscopic biopsy | Yes | Positive | -      |
| 40  | 71M | Sarcomatoid MM | thoracoscopic biopsy | No  | Negative | -      |

**\*Abbreviations:** MM: malignant mesothelioma; RMP: reactive mesothelial proliferation; IHC: immunohistochemistry; UIP: usual interstitial pneumonia; P/D: pleurectomy/decortication; NA: not available.

Letters a and b represent samples from the same patient.

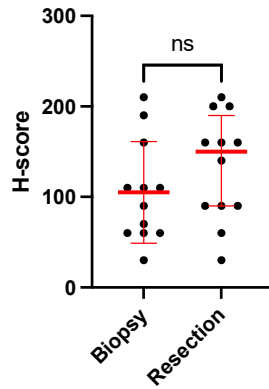

**Figure S1.** The H-scores of uPARAP expression in diagnostic biopsy vs. resection (P/D) samples. Biopsies (n=12) were taken at baseline from chemotherapy-naïve patients, whereas resection samples (n=12) were from matched patients after 3 cycles of neoadjuvant standard chemotherapy with cisplatin/pemetrexed doublet. The median H-scores revealed no significant effect of chemotherapy on the uPARAP expression (ratio paired t test;  $p = 0.3149$ ). Data represent the mean values  $\pm$  SD.

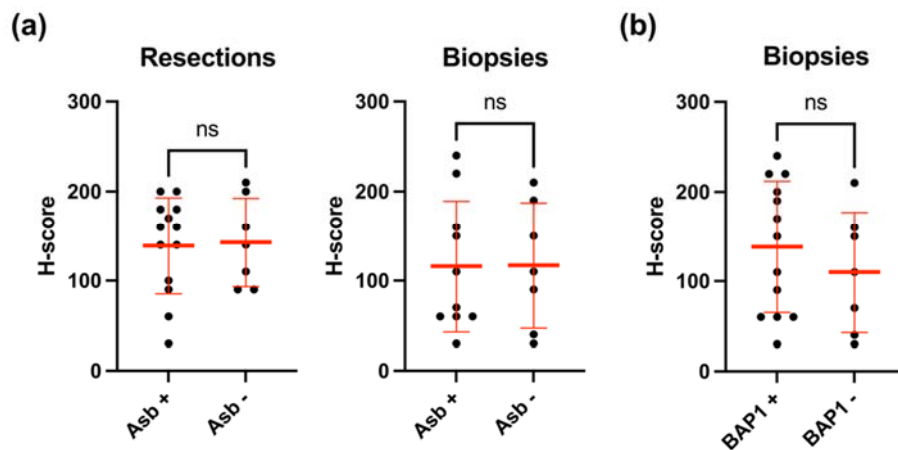

**Figure S2.** The uPARAP H-scores according to asbestos exposure and BAP1 expression in MM samples. Data are shown as mean  $\pm$  SD. **(a)** The uPARAP H-scores according to asbestos exposure for (*left*) resection samples (Asb+ n=13; Asb- n=7),  $p=0.8819$  and (*right*) for biopsy samples (Asb+ n=10; Asb- n=7),  $p=0.9745$ . **(b)** The uPARAP H-scores according to BAP1 expression for biopsy samples (BAP1+ n=13; BAP1- n=7),  $p=0.3967$ . Comparison was done using Welch's t-test.

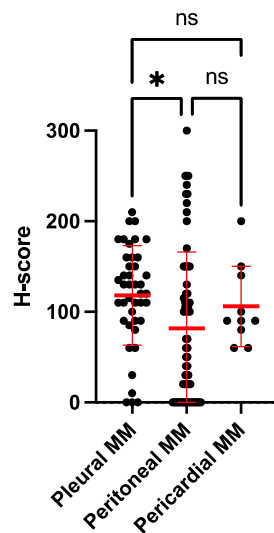

**Figure S3.** The uPARAP H-scores in MM TMA cores from different origin sites. The H-scores in tissue sections from pleural (n=42), peritoneal (n=66), and pericardial (n=10), MM were analyzed by Welch ANOVA test: pleural vs. peritoneal  $p=0.0227$ , pleural vs. pericardial  $p=0.8418$ , peritoneal vs. pericardial  $p=0.4305$ . Data shown as mean  $\pm$ SD.

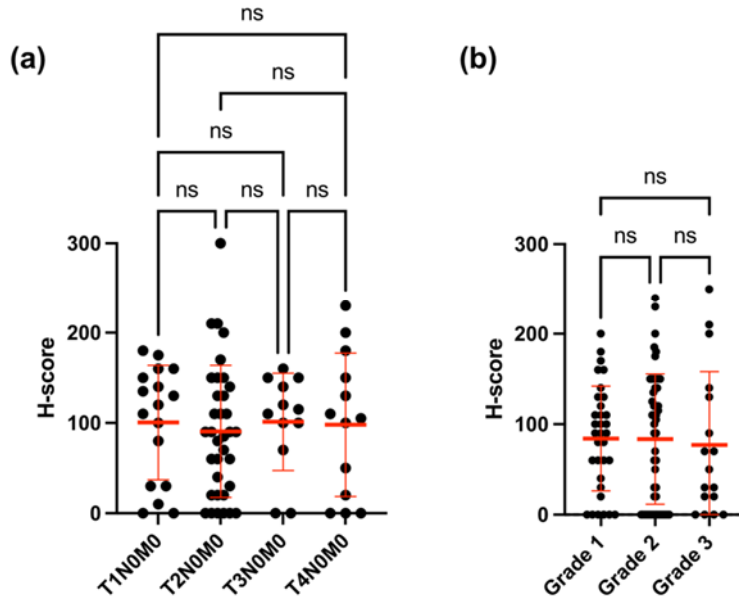

**Figure S4.** The uPARAP H-scores in MM TMA cores according to (a) TNM grade, T1N0M0 (n=17), T2N0M0 (n=35), T3N0M0 (n=12), and T4N0M0 (n=13) and (b) nuclear grade, which is determined for BMM and EMM tissue; Grade 1 (n=33), Grade 2 (n=50), Grade 3 (n=17). No significant difference has been found, (for ns:  $p>0.9999$ ). Data are analyzed by Welch's ANOVA test, bars shown as mean  $\pm$ SD.

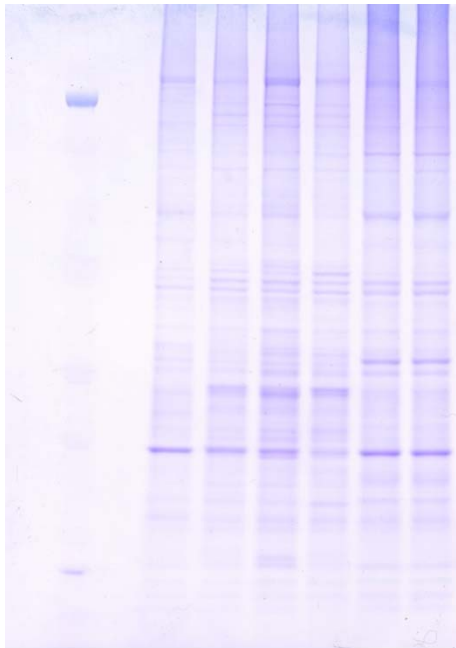

**Figure S5.** Coomassie staining as a loading control for the western blot experiment. After electroblotting, the residual protein left in the gel was stained with Coomassie® blue dye to confirm comparable loading.

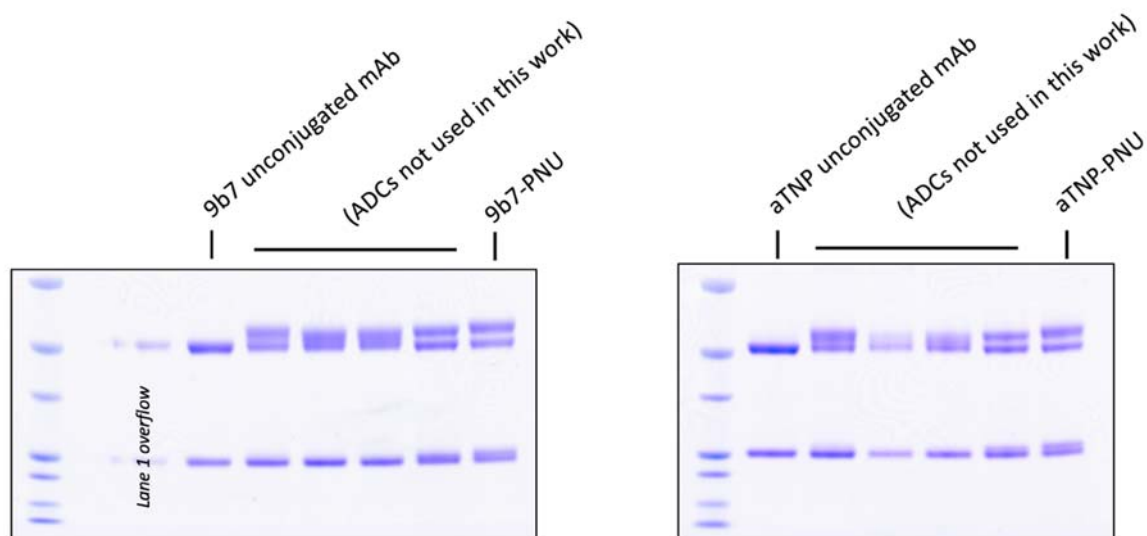

**Figure S6.** Covalent coupling of cytotoxic payload to mAbs, demonstrated by SDS-PAGE. Electrophoresis was performed after reducing sample pre-treatment, showing the heavy and the light chains of IgG, respectively, before and after coupling. The ADC preparations used in this work (indicated) were analysed along with other preparations.
